# Supplementary material for: Molten salt synthesis of CrMnFeNi alloy nanopowder passivated by TiOx–ZrOy shell used as a superior catalyst support in liquid-phase hydrogenation
Source: Royal Society of Chemistry journal article supplement (doi:10.1039/d3ra01797d), 2023-01-01
Supplement: d3ra01797d1.pdf [file d3ra01797d1.pdf]

ARTICLE

**Electronic Supplementary Information**

**Molten Salt Synthesis of CrMnFeNi Alloy Nanopowder Passivated by TiO<sub>x</sub>-ZrO<sub>y</sub> Shell  
Used as a Superior Catalyst Support in Liquid-phase Hydrogenation**

Yasukazu Kobayashi,<sup>\*a</sup> Shota Yokoyama<sup>b</sup> and Ryo Shoji<sup>b</sup>

<sup>a.</sup> *A Renewable Energy Research Centre, National Institute of Advanced Industrial Science and Technology, 2-2-9 Machiikedai, Koriyama, Fukushima 963-0298, Japan.*

*Corresponding author, E-mail: [yasu-kobayashi@aist.go.jp](mailto:yasu-kobayashi@aist.go.jp).*

<sup>b.</sup> *Department of Chemical Science and Engineering, National Institute of Technology, Tokyo College, 1220-2 Kunugida, Hachioji, Tokyo 193-0997, Japan.*

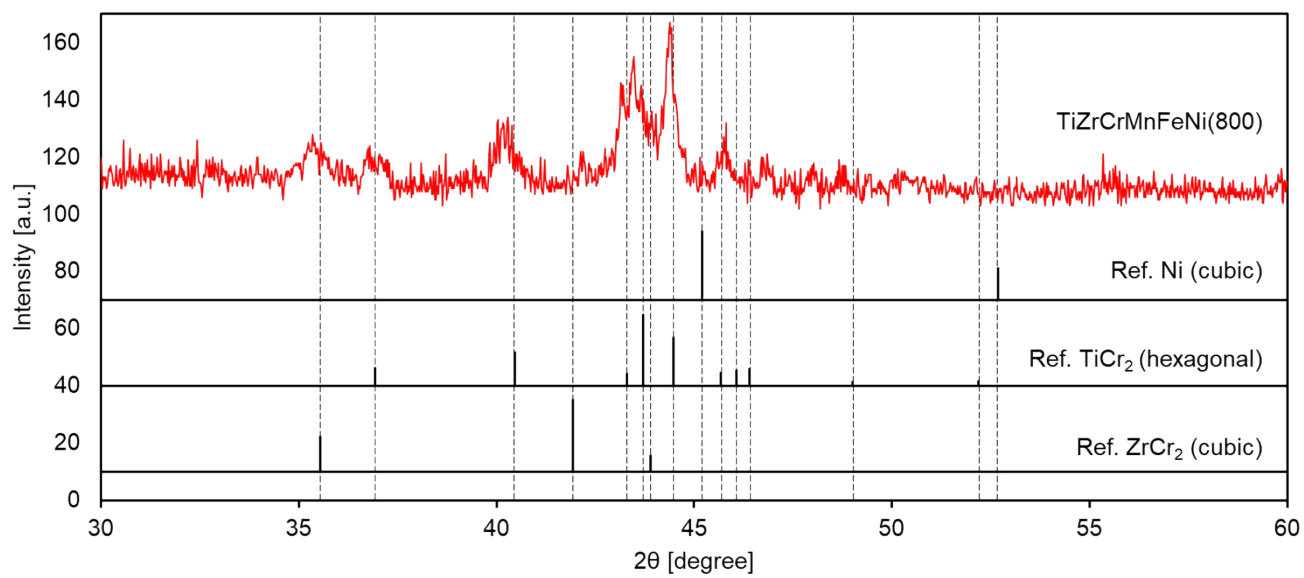

**Fig. S1** XRD patterns for TiZrCrMnFeNi(800).

**Table S1** Space group and crystal system for Laves phase intermetallic compounds.

| Intermetallic compound | Space group | Crystal system |
|------------------------|-------------|----------------|
| TiCr <sub>2</sub>      | P63/mmc     | hexagonal      |
| TiMn <sub>2</sub>      | P63/mmc     | hexagonal      |
| TiFe <sub>2</sub>      | P63/mmc     | hexagonal      |
| TiNi <sub>2</sub>      | n.d.        | n.d.           |
| ZrCr <sub>2</sub>      | Fd3(-)m     | cubic          |
| ZrMn <sub>2</sub>      | Fd3(-)m     | cubic          |
| ZrFe <sub>2</sub>      | P63/mmc     | hexagonal      |
| ZrNi <sub>2</sub>      | Fd3(-)m     | cubic          |

**Table S2** Elemental weight ratios measured using XPS, SEM–EDX, and TEM–EDX.

| Sample            | Elemental weight ratio [wt%] |          |      |      |      |      |      |      |      |                                                         |
|-------------------|------------------------------|----------|------|------|------|------|------|------|------|---------------------------------------------------------|
|                   | Method                       | Position | Ti   | Zr   | Cr   | Mn   | Fe   | Ni   | O    | Average                                                 |
| TiZrCrMnFeNi(Pre) | XPS                          | #1       | 5.1  | 19.5 | 11.2 | 11.5 | 8.4  | 8.2  | 36.1 | Ti/Zr/Cr/Mn/Fe/Ni/O<br>=6.8/18.7/10.1/12.2/9.7/7.6/35.0 |
|                   |                              | #2       | 5.3  | 18.6 | 8.4  | 11.9 | 12.7 | 8.6  | 34.4 |                                                         |
|                   |                              | #3       | 10.1 | 17.8 | 10.7 | 13.1 | 7.9  | 5.9  | 34.4 |                                                         |
| TiZrCrMnFeNi(800) | XPS                          | #1       | 13.3 | 35.7 | 3.6  | 3.6  | 3.1  | 3.0  | 37.6 | Ti/Zr/Cr/Mn/Fe/Ni/O<br>=12.7/33.5/5.3/4.1/3.9/2.3/38.1  |
|                   |                              | #2       | 14.0 | 34.2 | 8.0  | 3.1  | 4.1  | 0    | 37   |                                                         |
|                   |                              | #3       | 10.9 | 30.5 | 4.4  | 5.6  | 4.6  | 3.9  | 40.2 |                                                         |
|                   | SEM-EDX                      | Overall  | 8.3  | 47.9 | 7.5  | 7.2  | 7.9  | 7.8  | 13.3 | Ti/Zr/Cr/Mn/Fe/Ni/O<br>=8.2/48.4/8.0/8.0/8.7/9.2/9.5    |
|                   |                              | #1       | 6.9  | 71.7 | 3.2  | 3.0  | 3.4  | 3.3  | 8.6  |                                                         |
|                   |                              | #2       | 9.8  | 41.1 | 10.0 | 9.1  | 10.2 | 10.6 | 9.2  |                                                         |
|                   | TEM-EDX                      | #3       | 7.8  | 32.8 | 11.5 | 12.6 | 13.5 | 14.9 | 6.8  | Ti/Zr/Cr/Mn/Fe/Ni/O<br>=13.8/40.2/12.8/9.0/9.1/10.9/4.2 |
|                   |                              | #1       | 9.0  | 12.1 | 59.9 | 7.3  | 10.3 | 1.5  | 0.0  |                                                         |
|                   |                              | #2       | 1.5  | 1.5  | 13.8 | 26.3 | 27.6 | 28.9 | 0.4  |                                                         |
|                   |                              | #3       | 53.6 | 16.9 | 24.1 | 1.7  | 3.1  | 0.6  | 0.0  |                                                         |
|                   |                              | #4       | 3.2  | 4.0  | 11.7 | 26.0 | 26.3 | 28.0 | 0.8  |                                                         |
|                   |                              | #5       | 28.3 | 33.7 | 25.8 | 3.2  | 5.8  | 1.6  | 1.7  |                                                         |
|                   |                              | #6       | 4.0  | 7.7  | 66.7 | 8.4  | 11.8 | 1.4  | 0.0  |                                                         |
|                   |                              | #7       | 1.9  | 5.8  | 7.0  | 29.5 | 19.8 | 31.7 | 4.3  |                                                         |
|                   |                              | #8       | 3.4  | 10.2 | 18.7 | 20.0 | 25.8 | 17.1 | 4.9  |                                                         |
|                   |                              | #9       | 3.7  | 10.0 | 8.5  | 24.8 | 20.0 | 26.0 | 7.1  |                                                         |
|                   |                              | #10      | 5.8  | 92.6 | 0.1  | 0.1  | 0.3  | 0.4  | 0.7  |                                                         |
|                   |                              | #11      | 17.6 | 27.6 | 3.6  | 15.1 | 15.4 | 17.0 | 3.7  |                                                         |
|                   |                              | #12      | 76.9 | 19.7 | 0.3  | 0.4  | 0.5  | 0.5  | 1.7  |                                                         |
|                   |                              | #13      | 5.6  | 88.2 | 0.2  | 0.2  | 0.4  | 0.2  | 5.3  |                                                         |
|                   |                              | #14      | 4.8  | 47.0 | 0.5  | 2.3  | 3.0  | 35.3 | 7.2  |                                                         |
|                   |                              | #15      | 10.5 | 31.3 | 8.9  | 13.7 | 14.4 | 16.6 | 4.5  |                                                         |
|                   |                              | #16      | 29.4 | 46.9 | 0.6  | 1.1  | 1.7  | 2.3  | 17.9 |                                                         |
|                   |                              | #17      | 2.4  | 42.4 | 44.2 | 6.7  | 3.3  | 1.0  | 0.0  |                                                         |
|                   |                              | #18      | 12.9 | 28.4 | 8.1  | 16.3 | 16.9 | 14.3 | 3.2  |                                                         |
|                   |                              | #19      | 16.6 | 76.7 | 0.2  | 0.2  | 0.4  | 0.1  | 5.7  |                                                         |
| #20               |                              | 4.8      | 46.6 | 0.5  | 2.4  | 3.2  | 36.4 | 6.1  |      |                                                         |
| #21               |                              | 8.8      | 33.2 | 22.9 | 13.7 | 12.4 | 9.0  | 0.0  |      |                                                         |
| #22               |                              | 11.6     | 80.9 | 0.1  | 0.4  | 0.4  | 0    | 7    |      |                                                         |
| #23               | 6.5                          | 85.8     | 0.2  | 0.1  | 0.3  | 0.3  | 6.9  |      |      |                                                         |
| #24               | 9.6                          | 42.8     | 5.1  | 12.9 | 13.4 | 12.9 | 3.2  |      |      |                                                         |
| #25               | 13.8                         | 76.7     | 0.2  | 0.3  | 0.5  | 0.1  | 8.4  |      |      |                                                         |
| #26               | 13.2                         | 76.9     | 0.3  | 0.3  | 0.6  | 0.2  | 8.5  |      |      |                                                         |

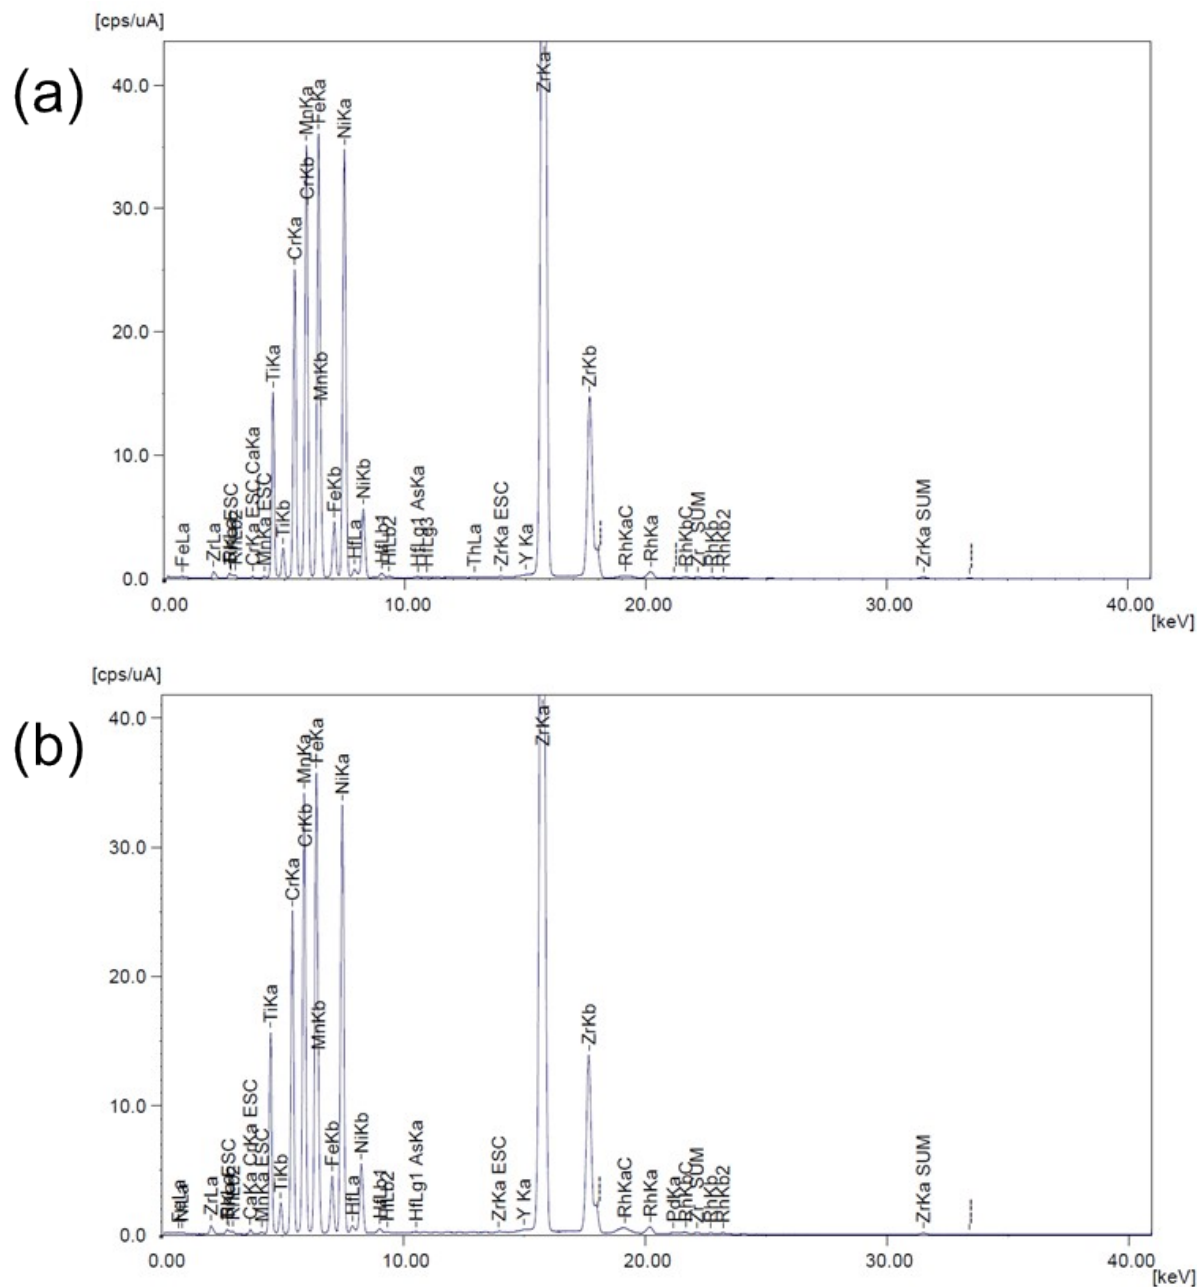

**Fig. S2** EDX spectrum measured by EDX-8000 for TiZrCrMnFeNi(Pre) and TiZrCrMnFeNi(800). Molar ratios of Ti/Zr/Cr/Mn/Fe/Ni are summarized in Table 1.

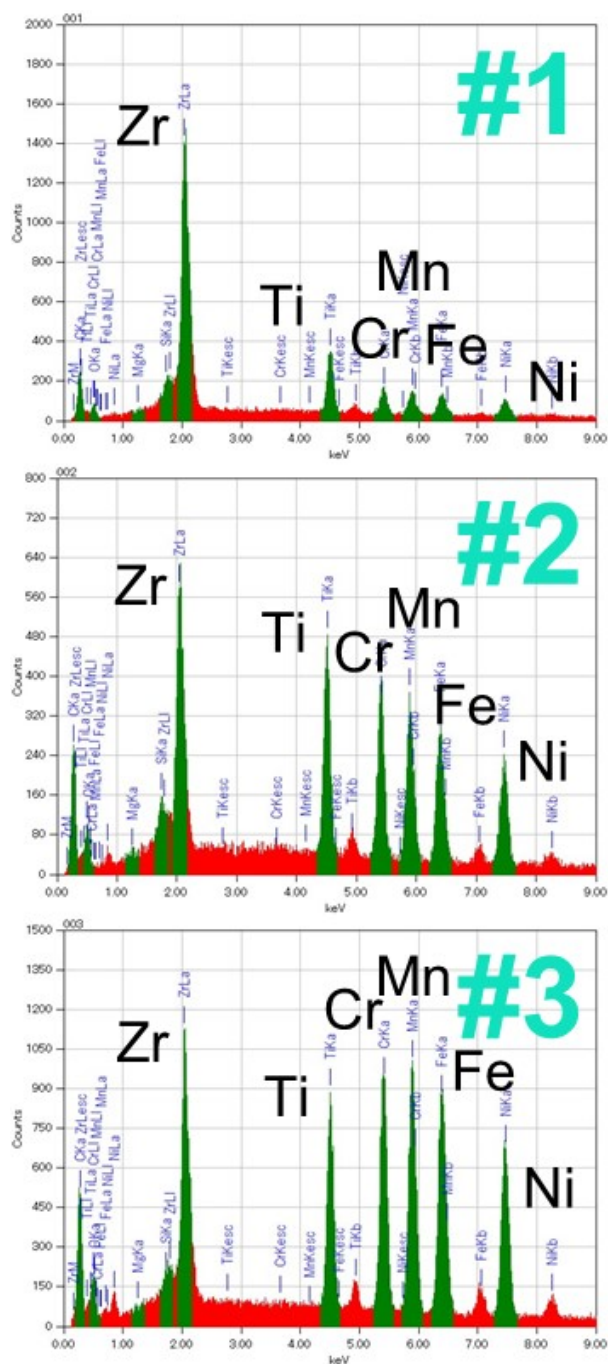

**Fig. S3** EDX spectra for position #1–#3 corresponding to a SEM image of TiZrCrMnFeNi(800) in Fig. 2.

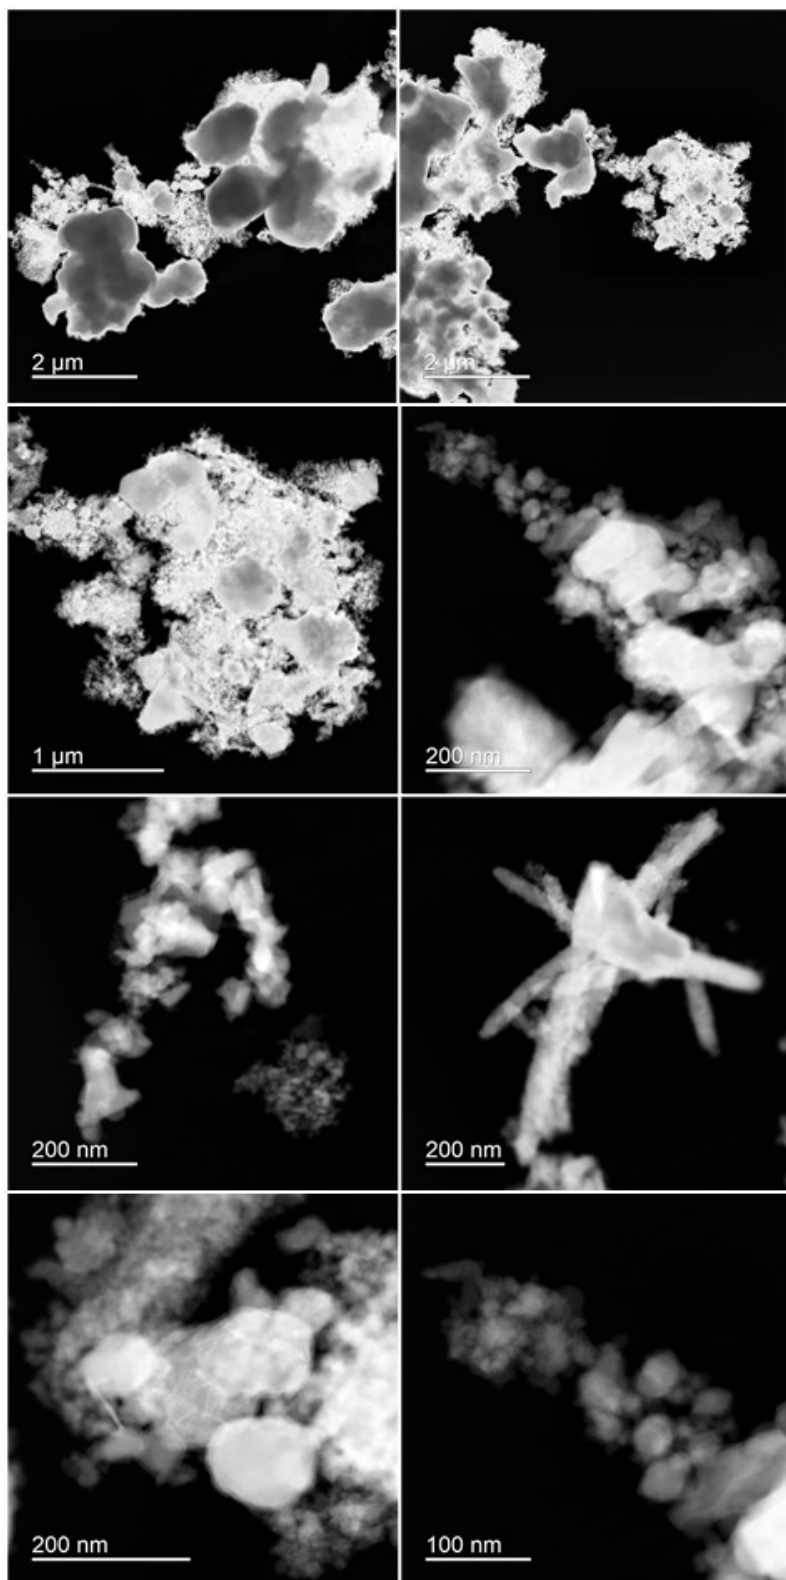

**Fig. S4** TEM images for TiZrCrMnFeNi(800).

**Table S3** Oxygen contents in TiZrCrMnFeNi(800) analyzed by LECO TCH-600.

| Sample            | No. | Used weight [mg] | Oxygen content [wt%] |
|-------------------|-----|------------------|----------------------|
| TiZrCrMnFeNi(800) | 1   | 10.7             | 4.38                 |
|                   | 2   | 10.7             | 4.41                 |
|                   | 3   | 10.1             | 4.42                 |



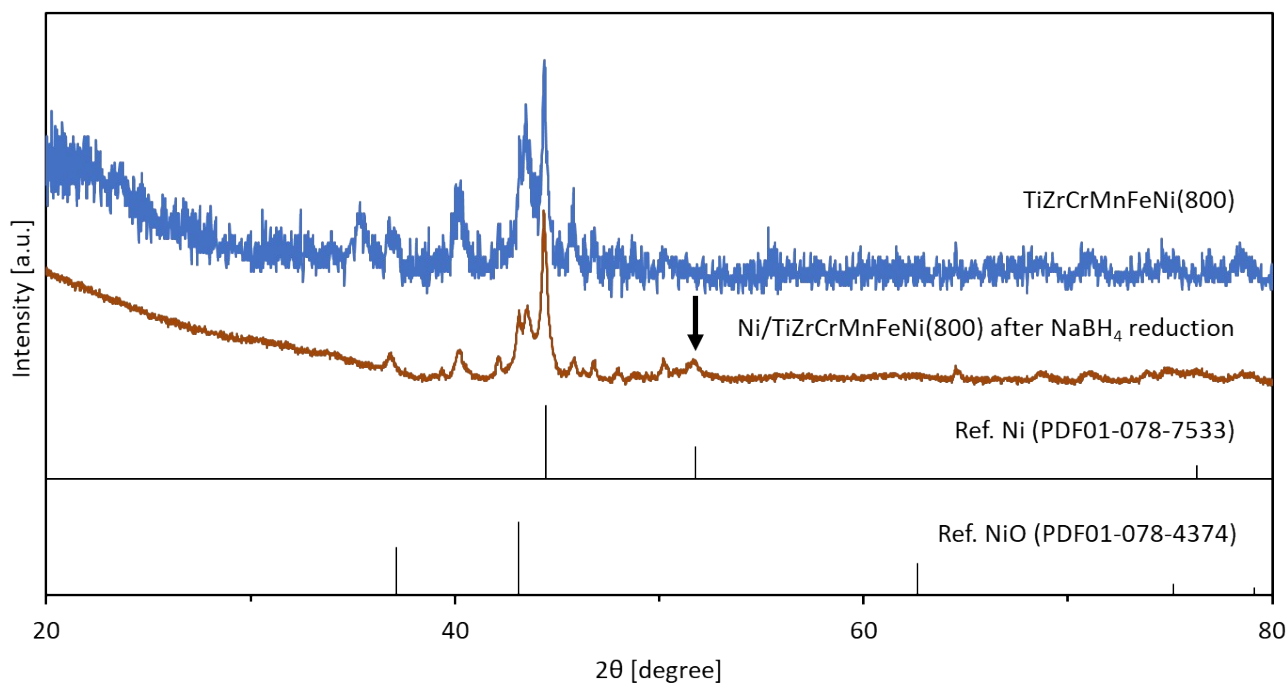

**Fig. S5** XRD patterns for TiZrCrMnFeNi(800) and Ni/TiZrCrMnFeNi(800) after reduced by NaBH<sub>4</sub> at 25°C for 30 min with references of Ni and NiO. An arrow indicates a position of 51.8° corresponding to a signal for a (2 0 0) plane of metallic Ni.
